# Supplementary material
Source: HighWire-hosted journal article supplement (https://cmaj.ca/highwire/filestream/77579/field_highwire_adjunct_files/2/200645-res-3-at.pdf)
Supplement: 200645-res-3-at.pdf [file 200645-res-3-at.pdf]

---

### **Appendix 3 (as supplied by the authors): Study selection figures**

Figure 1: Systematic review identification for ARDS

Figure 2: Study selection for ARDS

Figure 3: Study selection for COVID-19, SARS and MERS

Figure 4: Systematic review identification for influenza

Figure 5: Study selection for influenza

Figure 6: Systematic review identification for CAP

Figure 7: Study selection for CAP

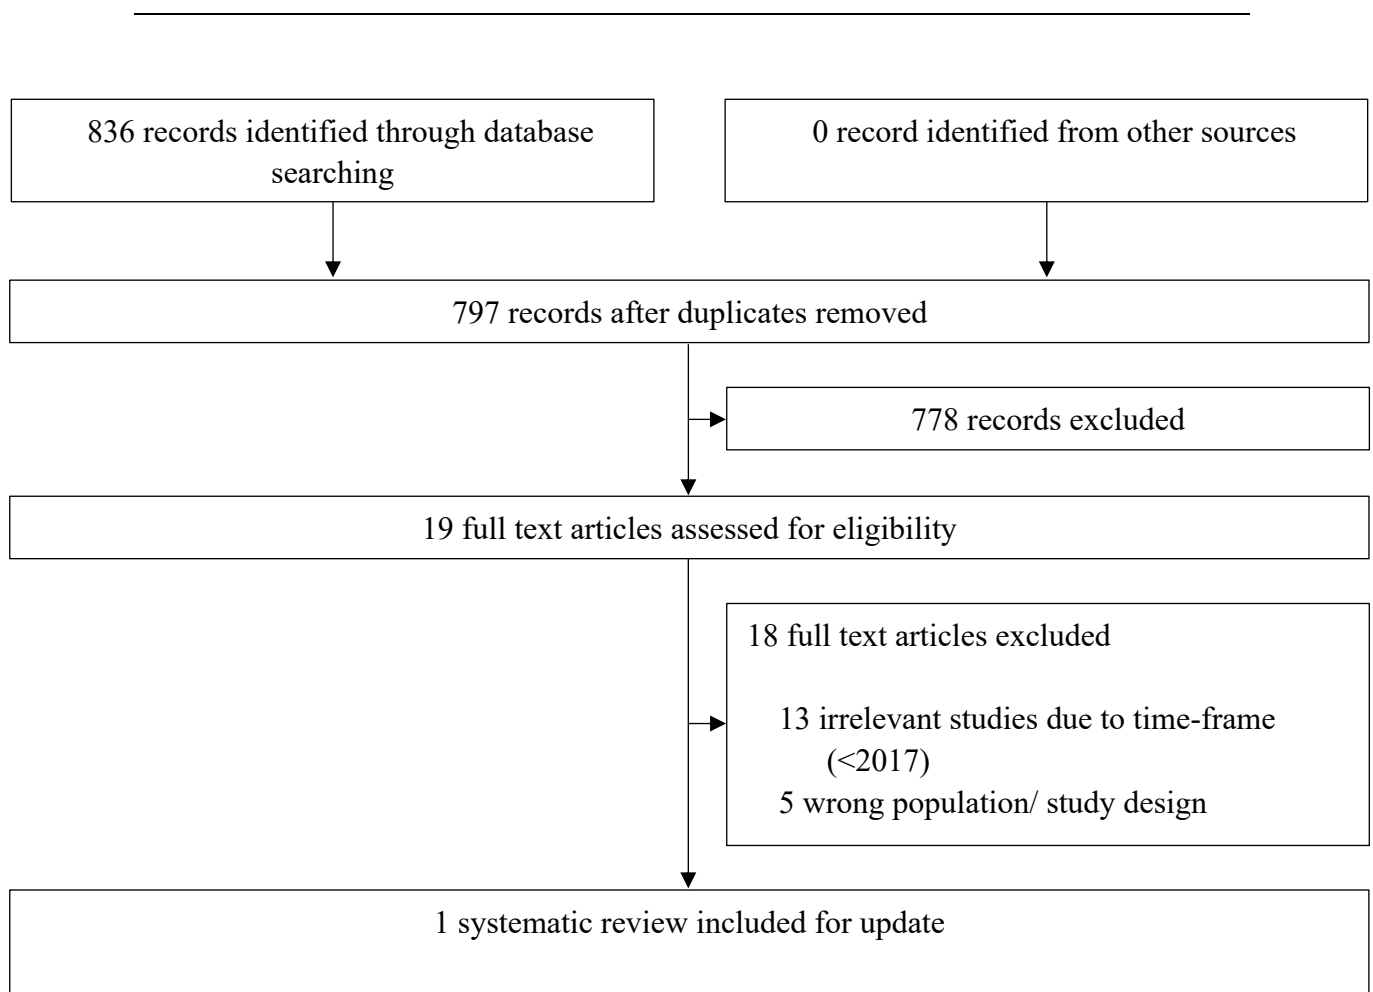

**Figure 1: Systematic review identification for ARDS**

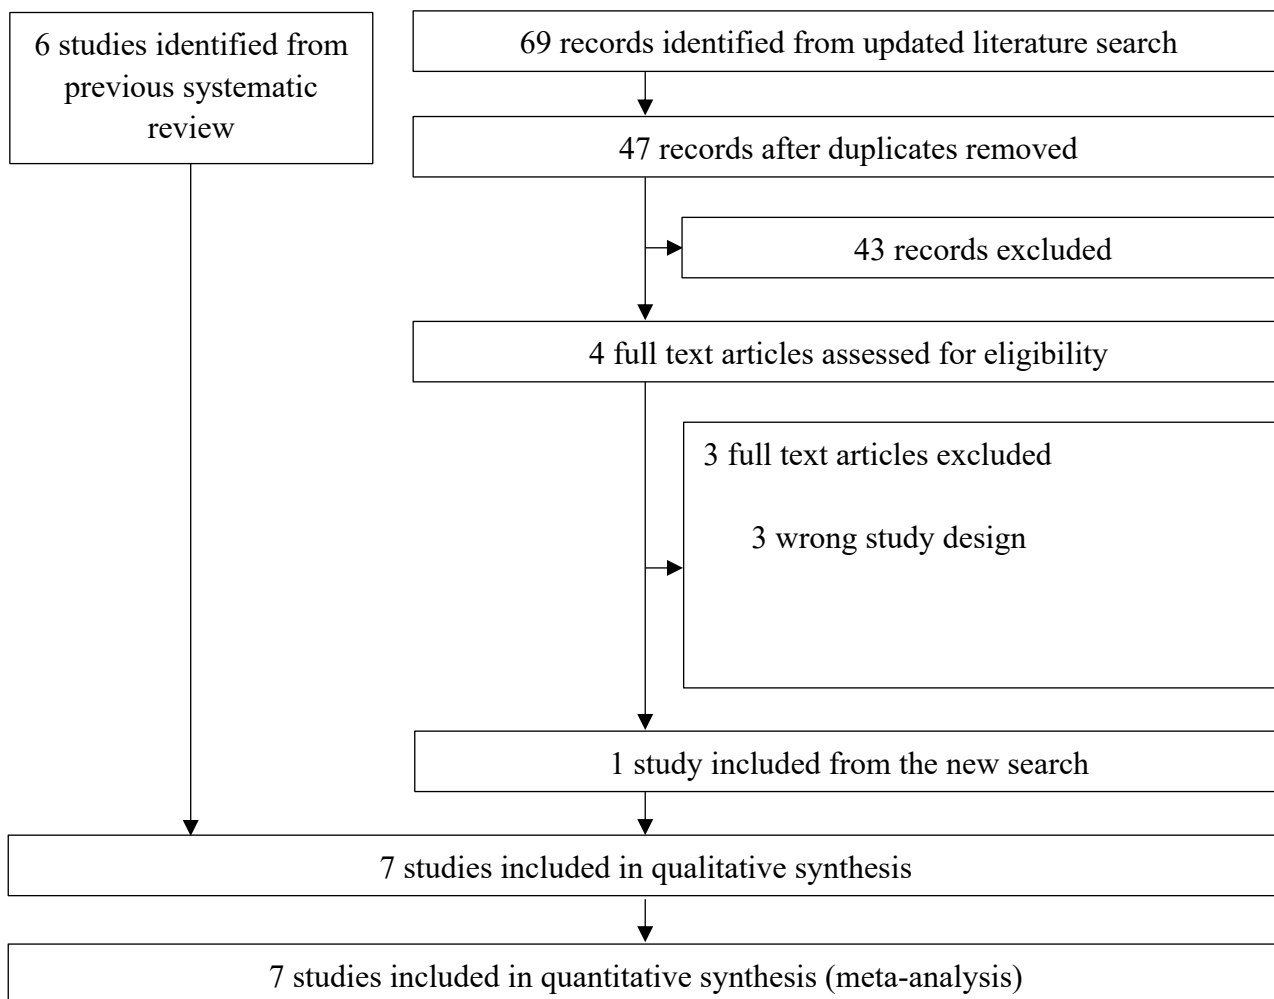

**Figure 2: Study selection for ARDS**

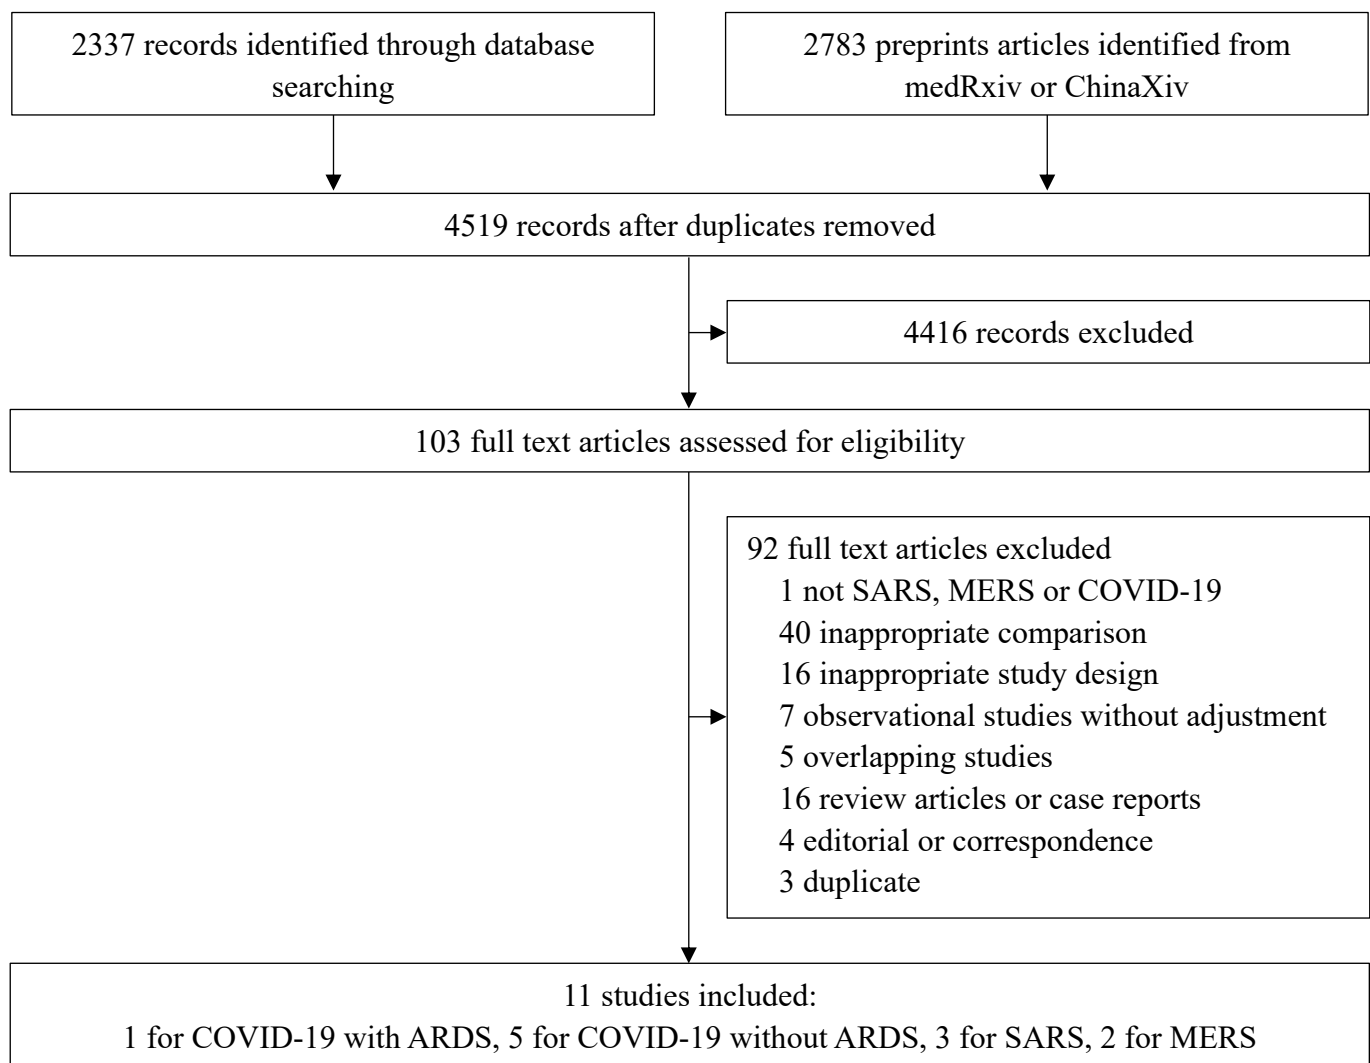

**Figure 3: Study selection for COVID-19, SARS and MERS**

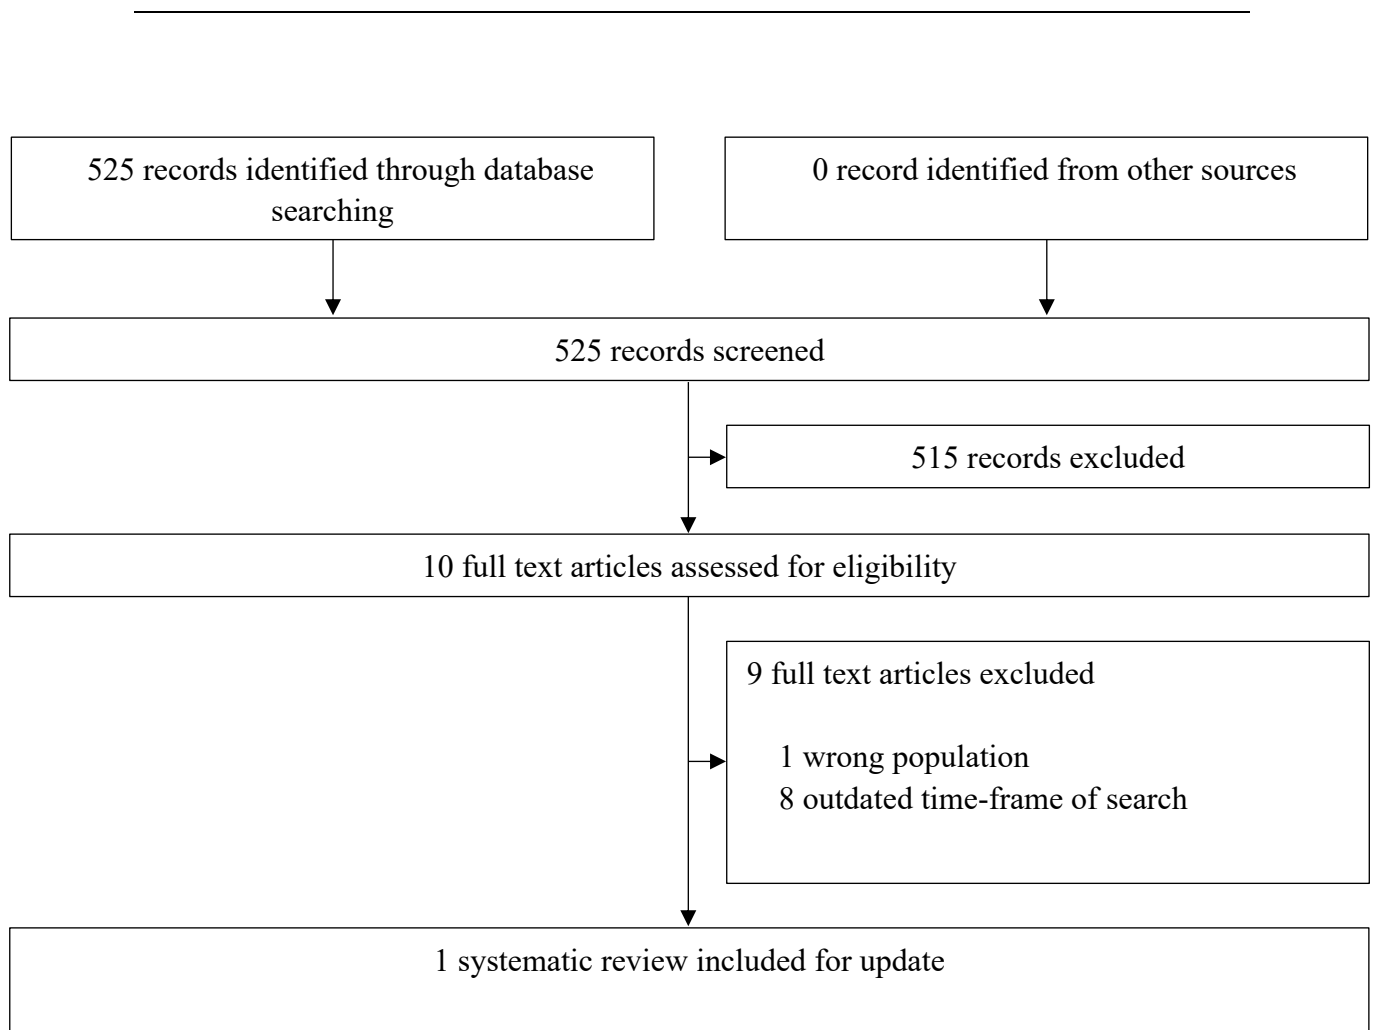

**Figure 4: Systematic review identification for influenza**

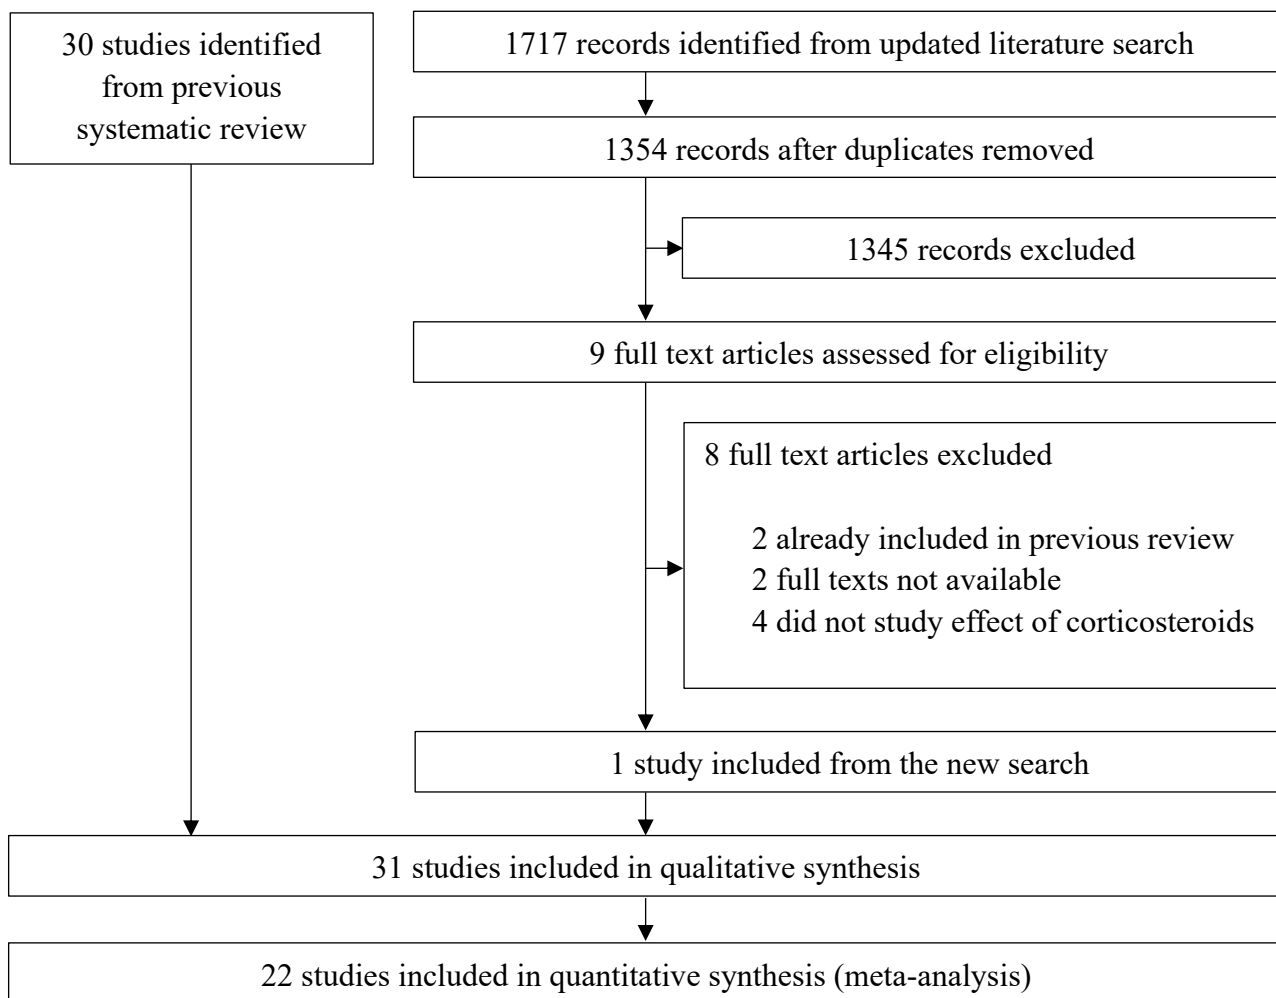

**Figure 5: Study selection for influenza**

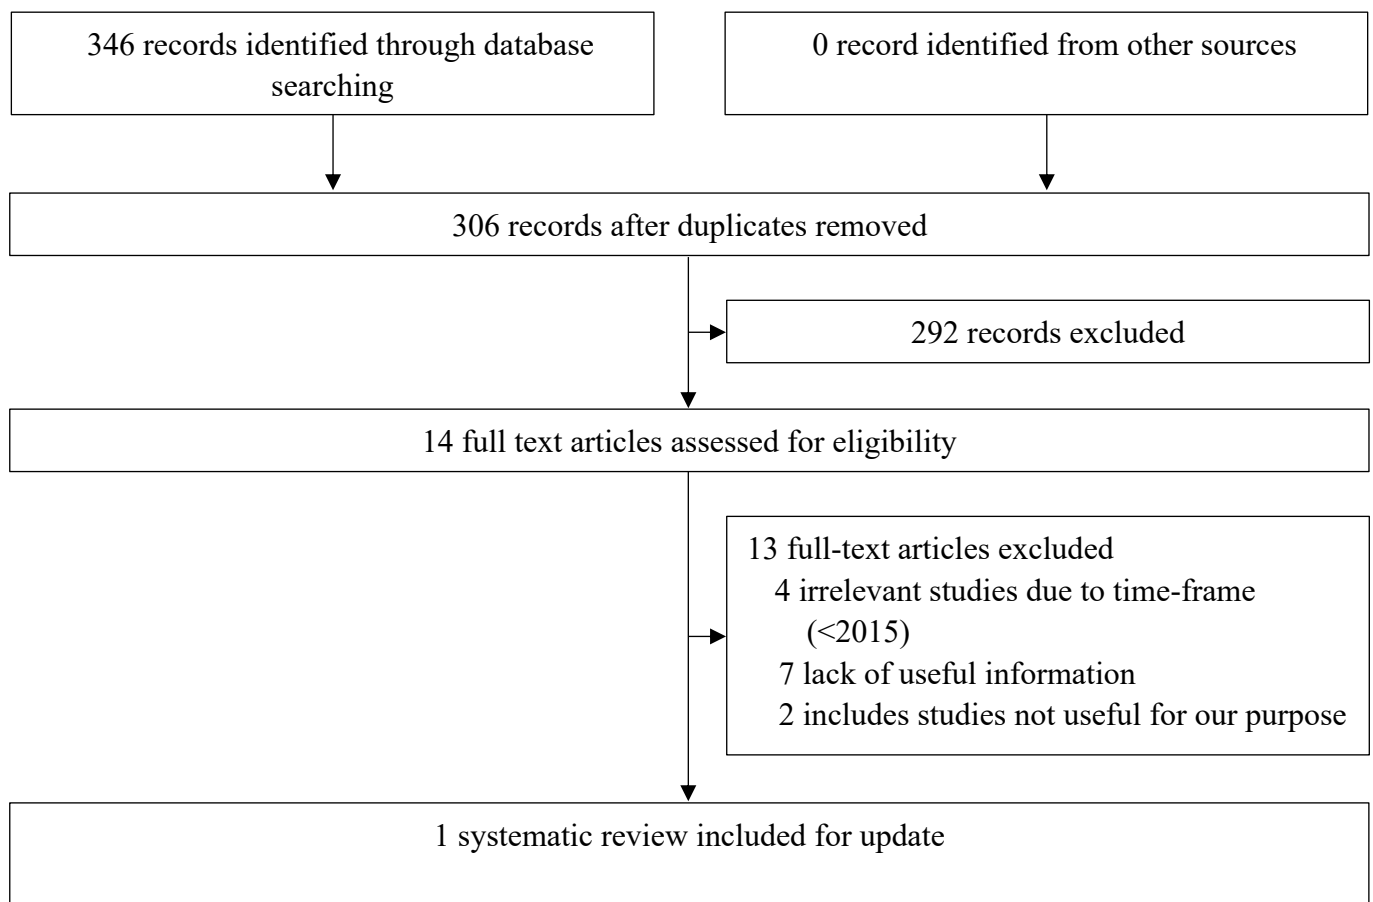

**Figure 6: Systematic review identification for CAP**

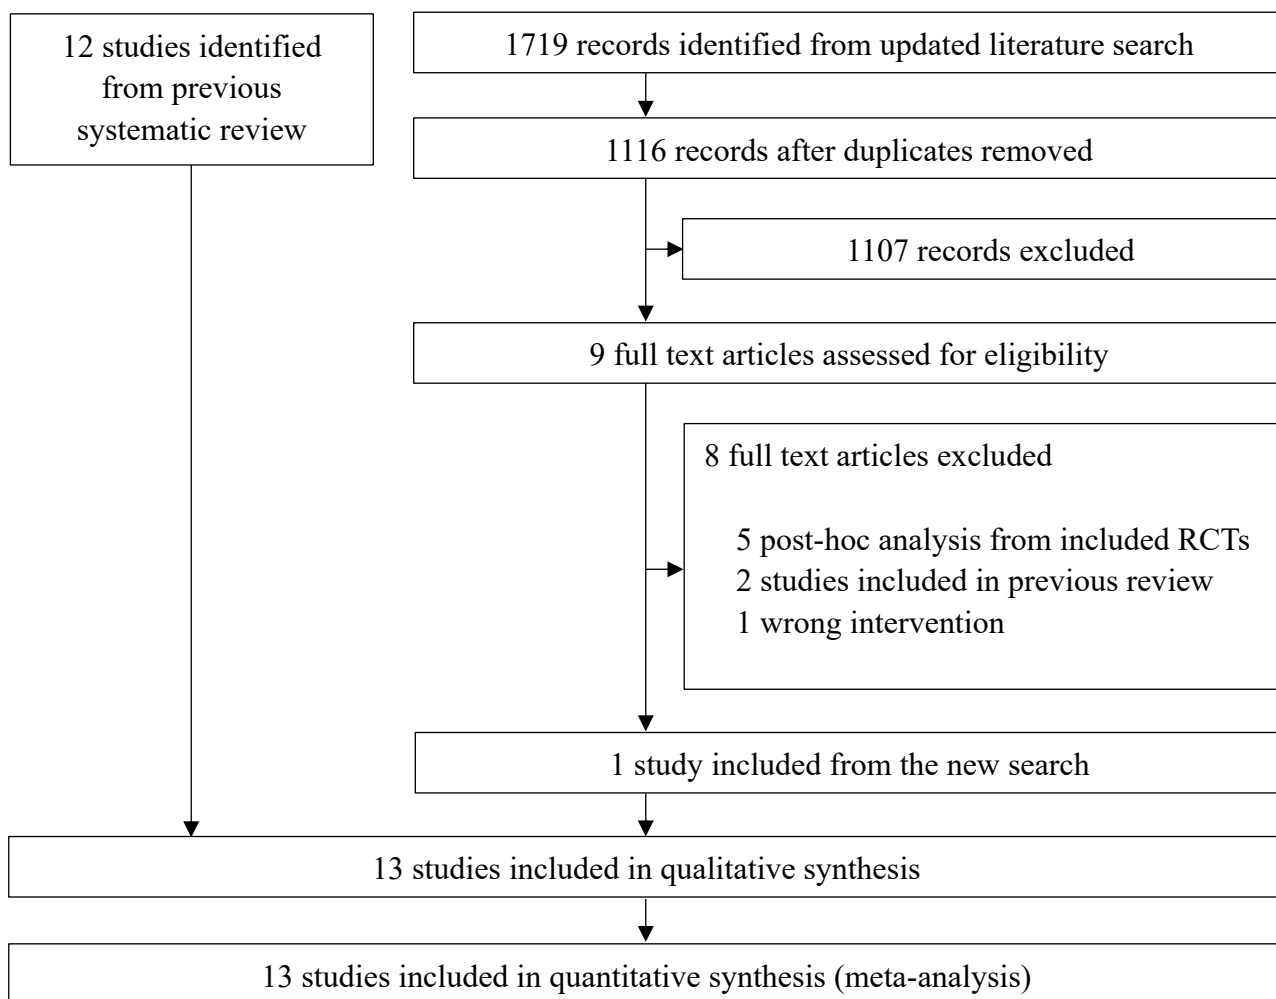

**Figure 7: Study selection for CAP**
